# Supplementary material
Source: Springer Nature journal article supplement (https://www.springermedizin.de/resource/supplementary/12985_2011_1658_MOESM5_ESM.pdf/9610346)

(a)

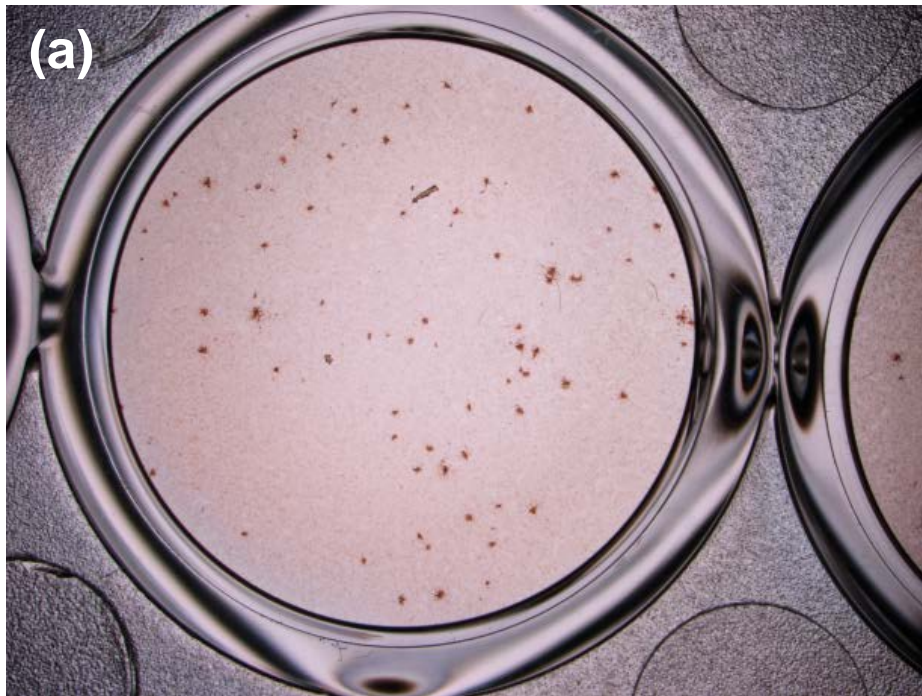

(b)

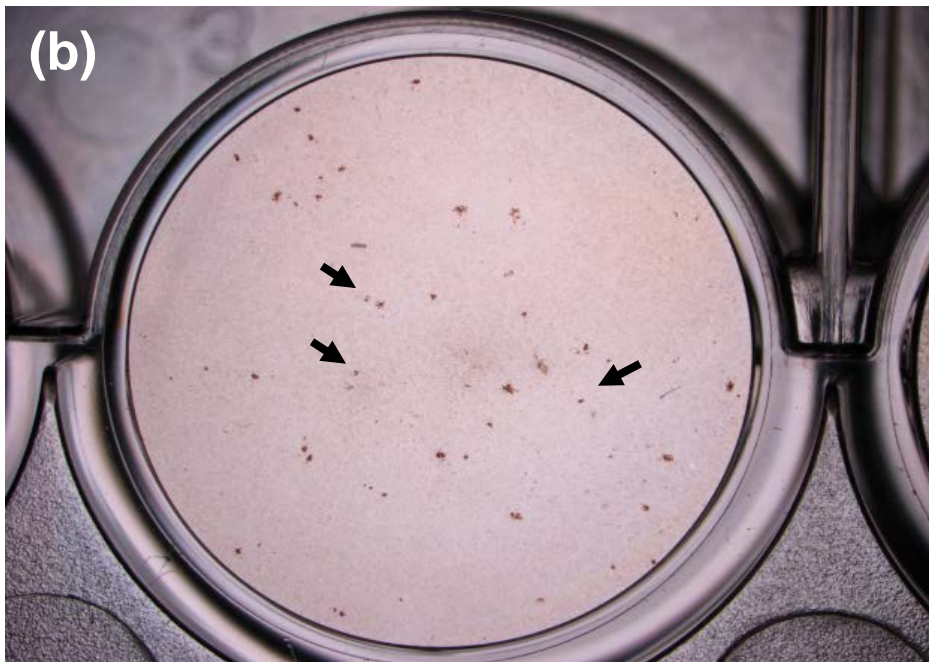

Supplement: MOESM5 [file 9610346]
